# Supplementary material for: Characterization of Galectin Fusion Proteins with Glycoprotein Affinity Columns and Binding Assays
Source: MDPI journal article supplement (doi:10.3390/molecules28031054), 2023-01-20
Supplement: s1 [file s1]

## Supporting information

### Characterization of galectin fusion proteins with glycoprotein affinity columns and binding assays

Carina Dey, Philip Palm, and Lothar Elling\*

*Laboratory for Biomaterials, Institute for Biotechnology and Helmholtz-Institute for Biomedical Engineering, RWTH Aachen University, Pauwelsstraße 20, 52074 Aachen, Germany*

\* Correspondence: l.elling@biotec.rwth-aachen.de; Tel.: +49 241 8028350

**Table S1.** Results of ASF and fetuin coupling to CNBr-activated Sepharose. Glycoprotein amounts were calculated by Bradford assay.

| Glycoprotein:     | Amount [mg] | Unbound [mg] | Coupled [mg] | Coupled [%] | Binding capacity [mg/mL] |
|-------------------|-------------|--------------|--------------|-------------|--------------------------|
| ASF (Batch I)     | 112.5       | 26.5         | 86.0         | 76.8        | 15.7                     |
| ASF (Batch II)    | 112.5       | 34.0         | 78.5         | 2.0         | 14.3                     |
| Fetuin (Batch I)  | 112.5       | 26.1         | 86.4         | 76.4        | 17.2                     |
| Fetuin (Batch II) | 112.5       | 27.1         | 85.4         | 76.0        | 15.5                     |

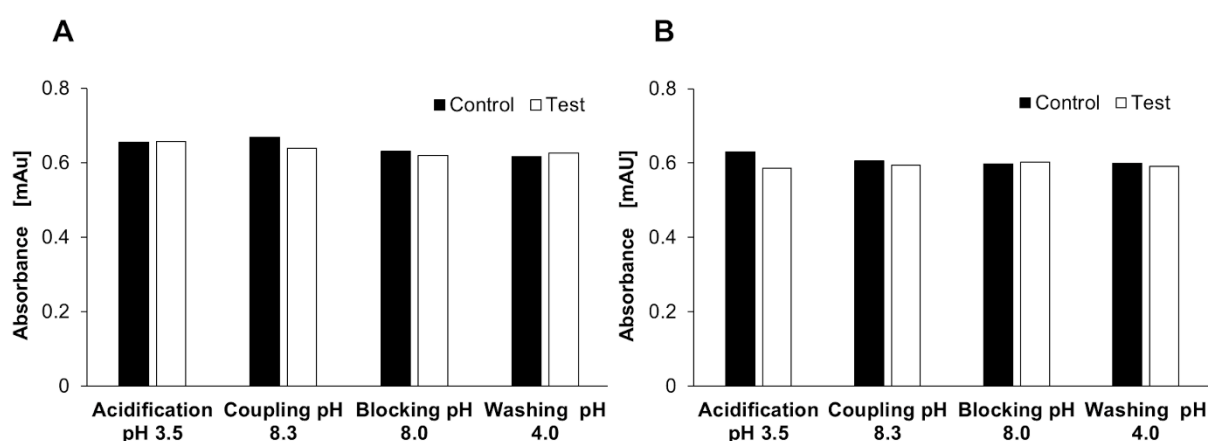

**Figure S1.** Enzyme-linked lectin assay (ELLA) of fetuin at different CNBr-activated sepharose coupling conditions.

**A:** Detection of the terminal of  $\alpha$ 2,3 sialic acids with *Maackia amurensis* lectin II (MAL II); **B:** Detection of terminal  $\alpha$ 2,6 sialic acids with *Sambucus nigra* elderberry bark lectin (EBL). Test: Treated fetuin sample with acidification solution pH 3.5, coupling buffer pH 8.0, blocking buffer pH 8.0, or washing buffer pH 4.0; Control: Untreated fetuin sample.

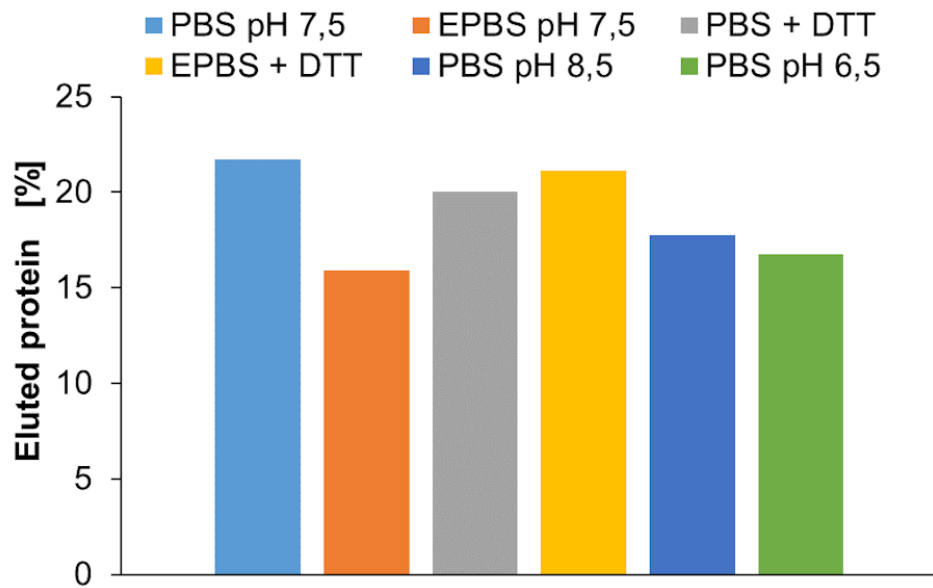

**Figure S2.** Comparison of buffers for binding HSYGal-3 on ASF-Sepharose. 3 mg of HSYGal-3 from one single expression batch was applied to the column in different buffers and eluted with lactose in a gradient mode (0-0.3 M lactose in PBS pH 7.5 within 15 min). The highest amount of eluted protein was observed for HSYGal-3 in PBS pH 7.5.

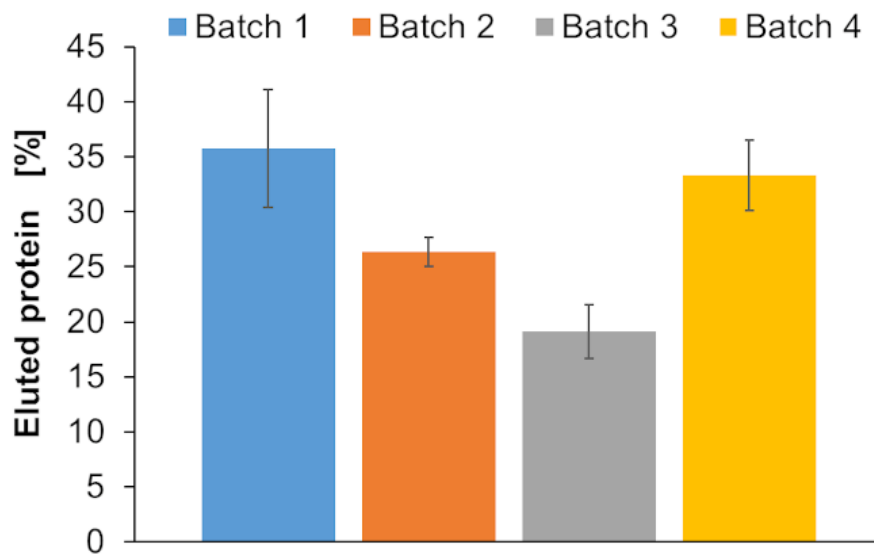

**Figure S3.** Dependency of expression batch on HSYGal-3 yield in ASF affinity chromatography. 4 mg of HSYGal-3 IMAC eluate of four different expression batches were applied to the ASF-Sepharose and eluted with lactose in a gradient mode (0-0.3 M lactose in PBS pH 7.5 within 15 min).

**Table S2.** Lactose concentrations for elution of galectins in glycoprotein affinity chromatography. Lactose concentrations were determined by gradient elution as the mean signal of two data points for ASF-Sepharose. For Fetuin-Sepharose lactose concentration was calculated once.

|                  | Lactose concentration [mM] |                  |
|------------------|----------------------------|------------------|
|                  | ASF-Sepharose              | Fetuin-Sepharose |
| HGal-1C2S        | 30 ± 5                     | 20               |
| HSDsRedMGal-1C2S | 22 ± 2                     | 27               |
| HGal-3           | 36 ± 8                     | 25               |
| HSYGal-3         | 25 ± 4                     | 22               |
| HGal-8N          | 20 ± 0                     | 32               |
| HseGFPGal-8N     | 16 ± 1                     | 30               |
| HGal-8C          | -                          | -                |
| HSeGFPGal-8C     | 20 ± 0                     | 23               |

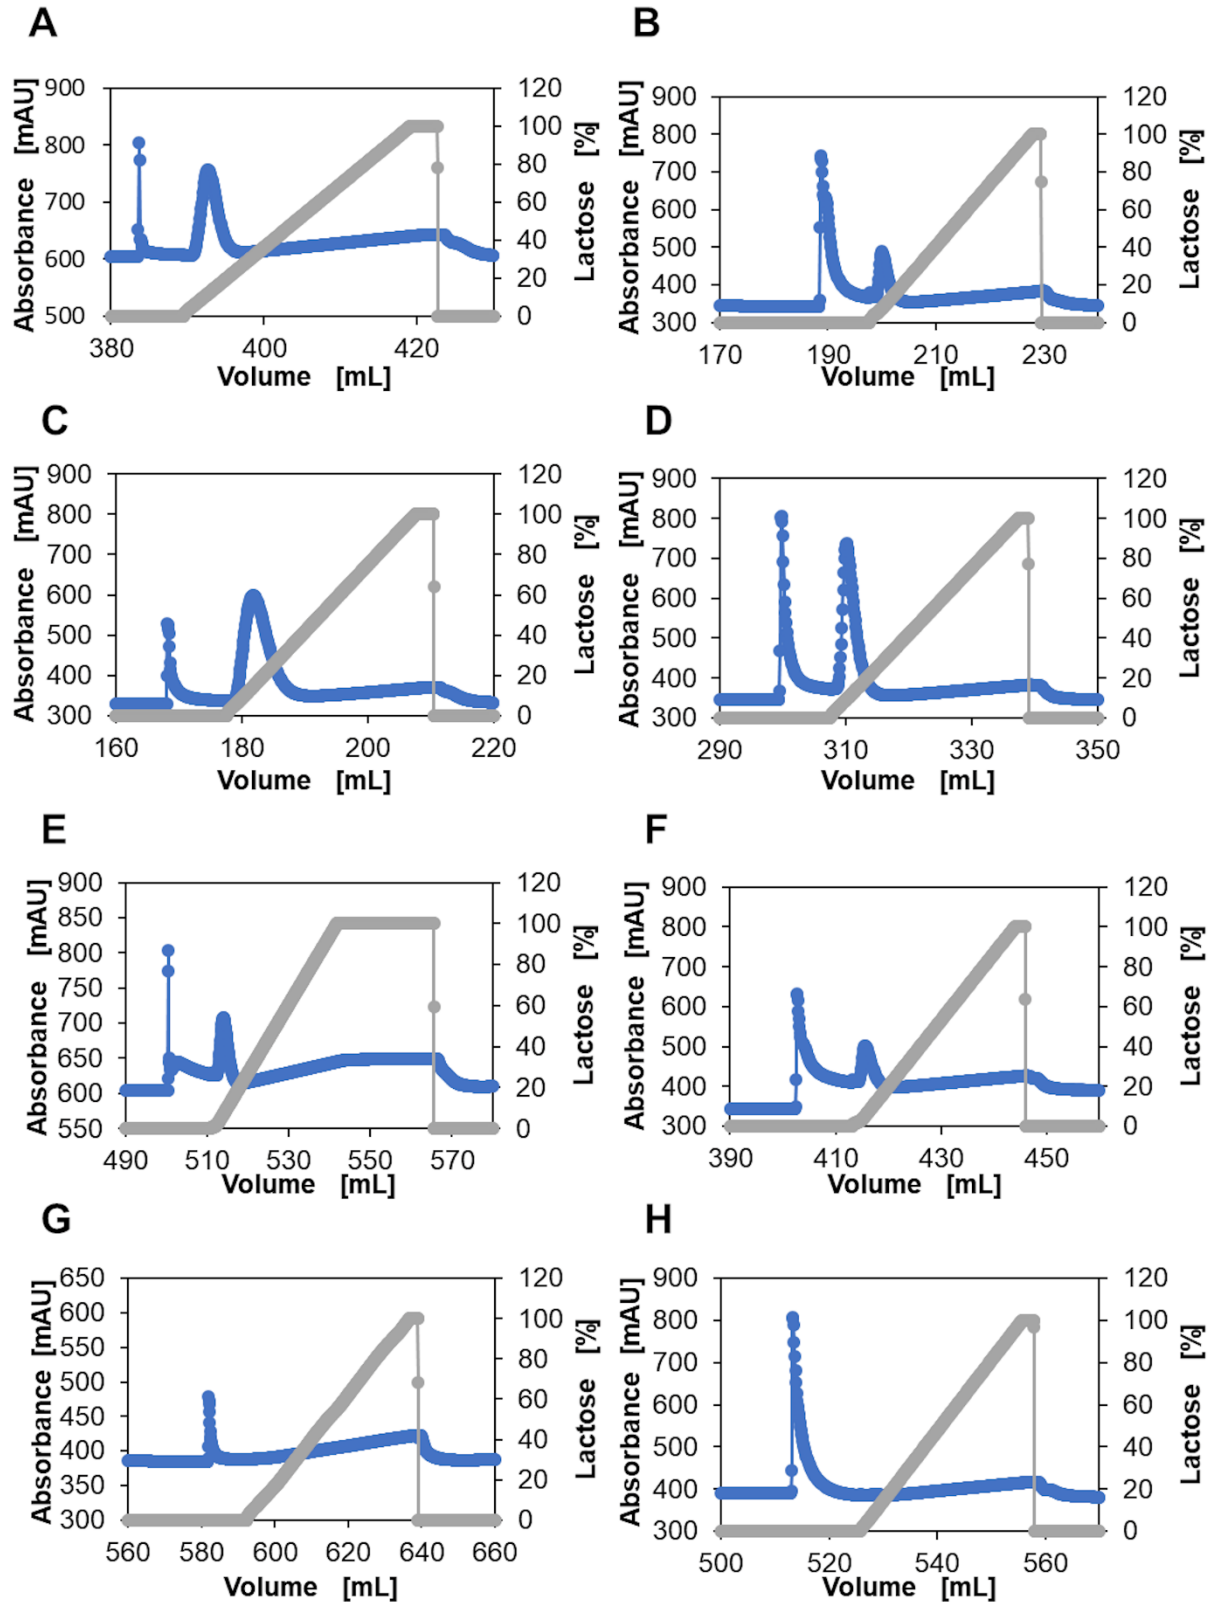

**Figure S4.** Elution profiles of galectin purification on ASF-Sepharose.

0.2  $\mu$ mol galectin in PBS pH 7.5 was applied and eluted with lactose in a gradient mode (0-0.3 M lactose in PBS pH 7.5 within 15 min; 0%=0 mM lactose, 100%=0.3 M lactose). Blue line: Absorbance at 280 nm; Grey line: Concentration of lactose [%]. **A:** HGal-1C2S; **B:** HSDsRedMGal-1C2S; **C:** HGal-3; **D:** HSYGal-3; **E:** HGal-8N; **F:** HSeGFPGal-8N; **G:** HGal-8C; **H:** HSeGFPGal-8C.

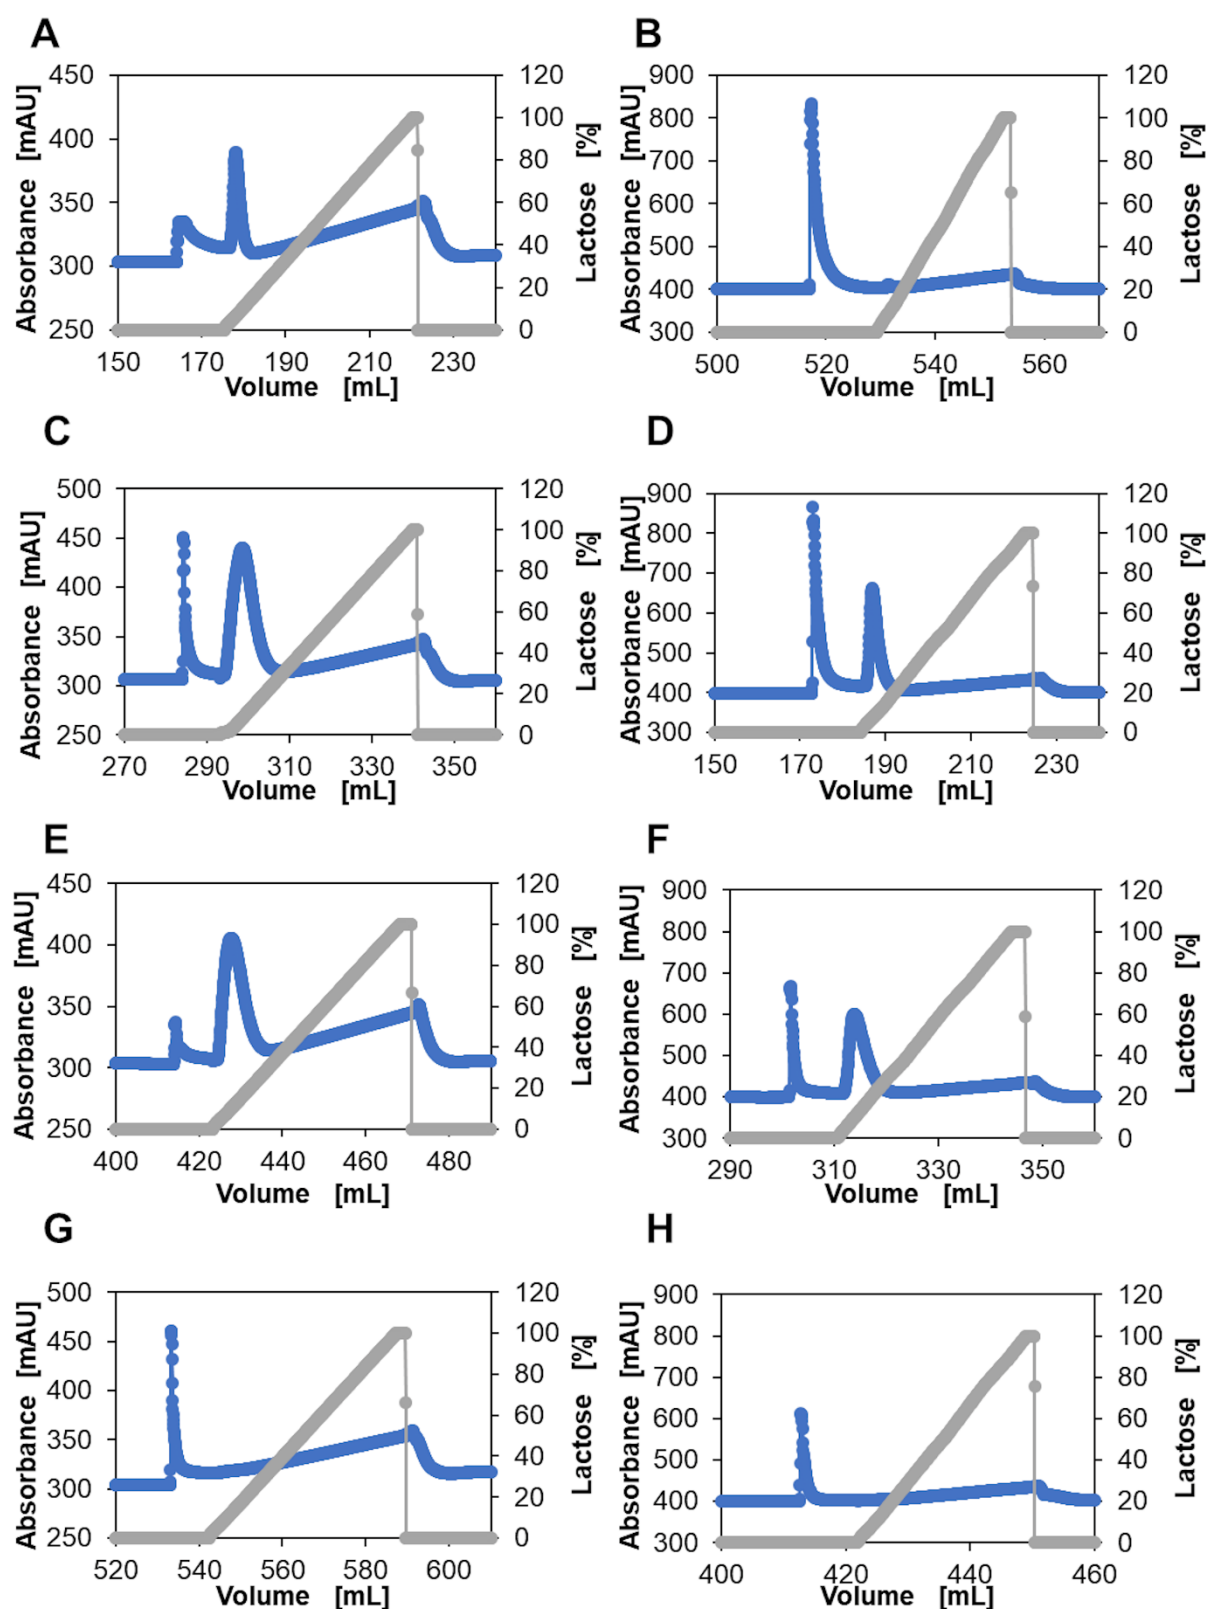

**Figure S5.** Elution profiles of galectin purification on Fetuin-Sepharose.

0.2  $\mu$ mol galectin in PBS pH 7.5 was applied and eluted with lactose in a gradient mode (0-0.3 M lactose within 15 min; 0%=0 mM lactose, 100%=0.3 M lactose). Blue line: Absorbance at 280 nm; Grey line: Concentration of lactose [%]. **A:** HGal-1C2S; **B:** HSDsRedMGal-1C2S; **C:** HGal-3; **D:** HSYGal-3; **E:** HGal-8N; **F:** HSeGFPGal-8N; **G:** HGal-8C; **H:** HSeGFPGal-8C.

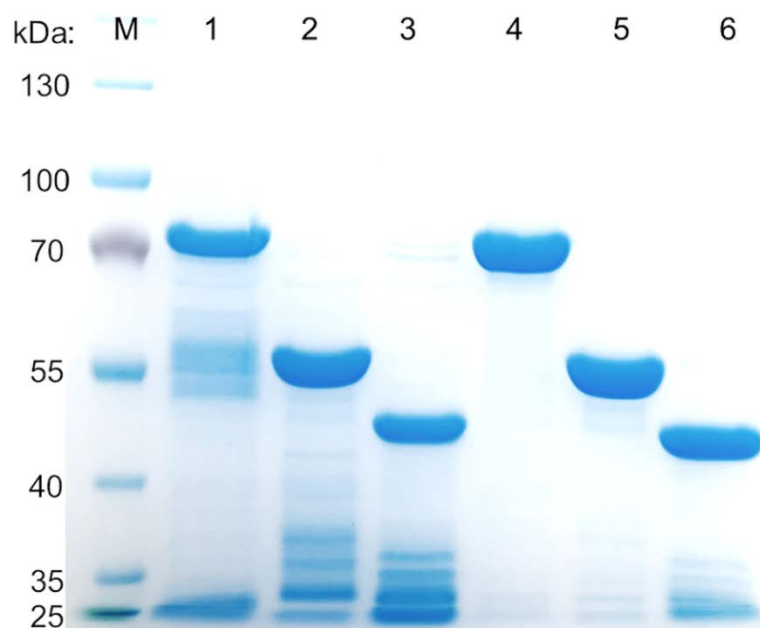

**Figure S6.** SDS-PAGE of Gal-3 fusion proteins after IMAC and ASF affinity chromatography. M: Protein-Standard (10-180 kDa); **1:** HSYGal-3 IMAC eluate (74.2 kDa); **2:** HYGal-3 IMAC eluate (56 kDa); **3:** HSGal-3 IMAC eluate (46.9 kDa); **4:** HSYGal-3 ASF affinity resin eluate (74.2 kDa); **5:** HYGal-3 ASF affinity resin eluate (56 kDa); **6:** HSGal-3 ASF affinity resin eluate (46.9 kDa).

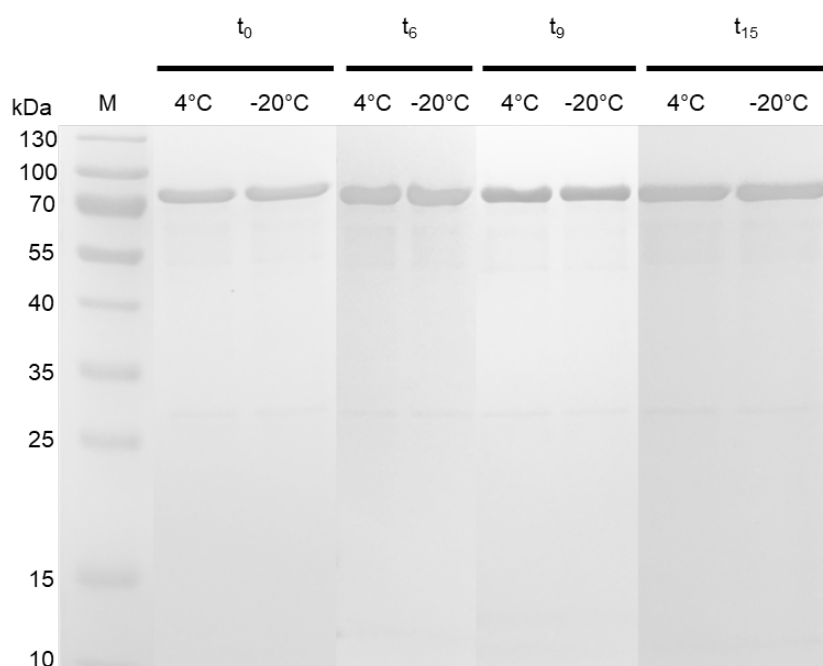

**Figure S7.** Analysis HSYGal-3 storage stability. HSYGal-3 was purified with IMAC and ASF-Sepharose and stored at 4°C and -20°C in EPBS pH 7.5. Samples were taken on different days after purification ( $t_0$ ,  $t_6$ ,  $t_9$ ,  $t_{15}$ ) and in each case 5  $\mu$ g protein was analyzed using discontinuous SDS-PAGE.

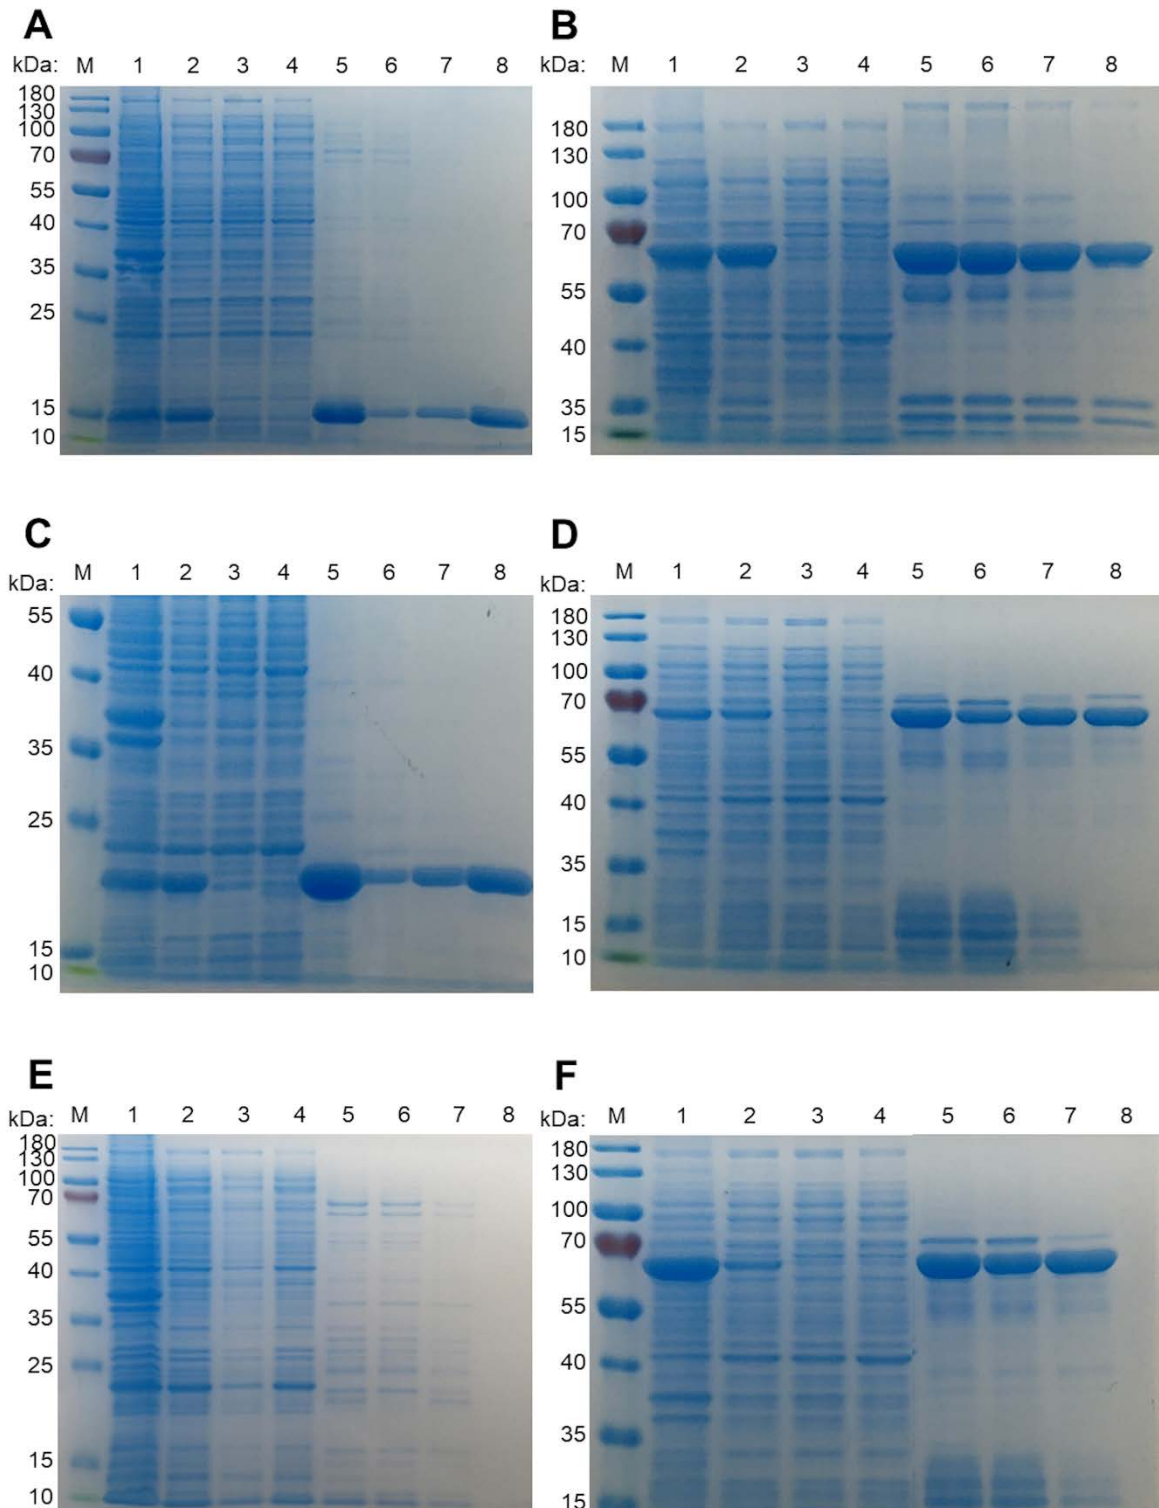

**Figure S8.** SDS-PAGE analysis of IMAC and ASF glycoprotein resin purified galectins.

**A:** HGal-1C2S (16 kDa); **B:** HSDsRedMGal-1C2S (64 kDa); **C:** HGal-8N (20.4 kDa); **D:** HSeGFPGal-8N (66.4 kDa); **E:** HGal-8C (17.8 kDa); **F:** HSeGFPGal-8C (63.9 kDa); M. Protein Standard (10-180 kDa); 1: Pellet; 2: Crude extract; 3: IMAC Flowthrough; 4: IMAC wash step; 5: IMAC eluate; 6: ASF affinity resin flowthrough; 7: ASF affinity resin wash; 8: ASF affinity resin eluate.



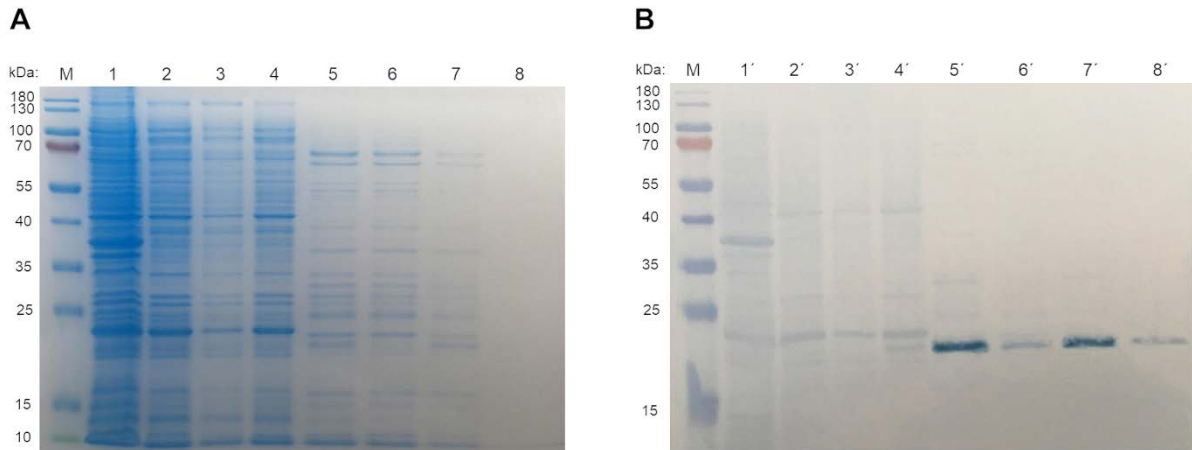

**Figure S9.** SDS-PAGE (**A**) and Western blot (**B**) of IMAC and ASF-affinity purification of HGal-8C.

**A:** SDS-PAGE with Coomassie staining: M. Protein Standard (10-180 kDa); 1: Pellet; 2: Crude extract; 3: IMAC Flowthrough; 4: IMAC wash step; 5: IMAC eluate; 6: ASF affinity resin flowthrough; 7: ASF affinity resin wash; 8: ASF affinity resin eluate. **B:** Western blot analysis with anti-His<sub>6</sub>-antibody: M. Protein Standard (10-180 kDa); 1': Pellet; 2': Crude extract; 3': IMAC Flowthrough; 4': IMAC wash step; 5': IMAC eluate; 6': ASF affinity resin flowthrough; 7': ASF affinity resin wash; 8': ASF affinity resin eluate;  $M_w$  (HGal-8C) = 17.8 kDa.



**A**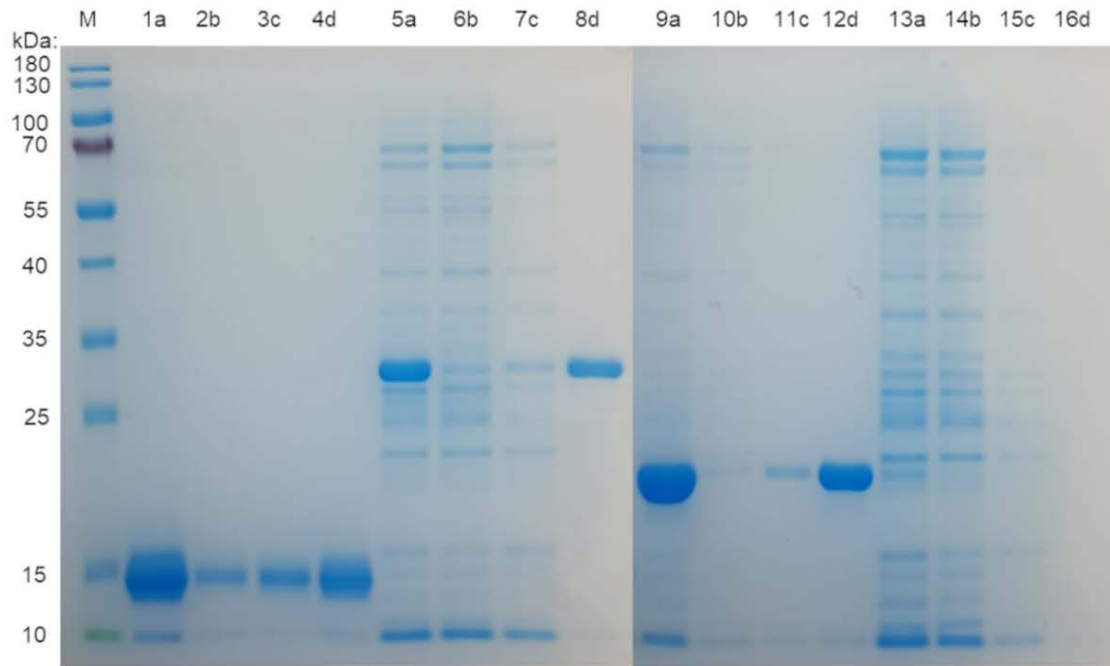**B**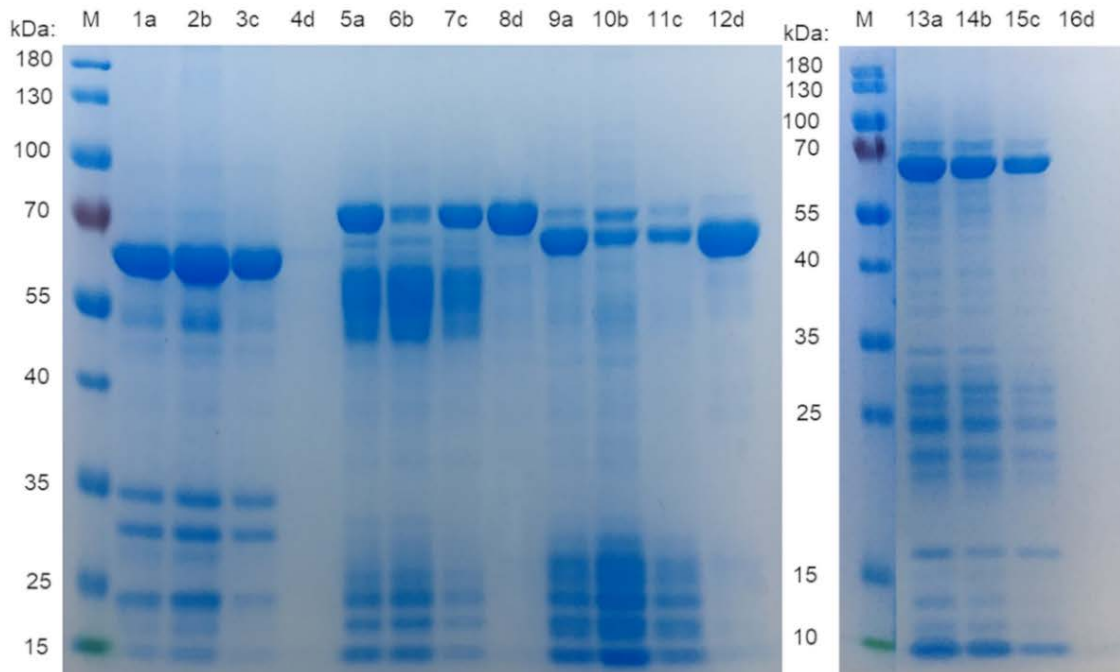

**Figure S10.** SDS-PAGE analysis of IMAC and fetuin affinity purified galectins.

**A:** His<sub>6</sub>-tagged galectins (1-4: HGal-1C2S (16 kDa), 5-8 HGal-3 (28 kDa), 9-12: HGal-8N (20.4 kDa), 13-16 HGal-8C (17.8 kDa)); **B:** Galectin fusion proteins (1-4: HSDsRedMGal-1C2S (64 kDa), 5-8 HSYGal-3 (74 kDa), 9-12: HSeGFPGal-8N (66.4 kDa), 13-16 HSeGFPGal-8C (63.9 kDa)); for each galectin from left to right: a: IMAC eluate, b: fetuin affinity resin flowthrough, c: fetuin affinity resin wash, d: fetuin affinity resin eluate; M: Protein standard (10-180 kDa).

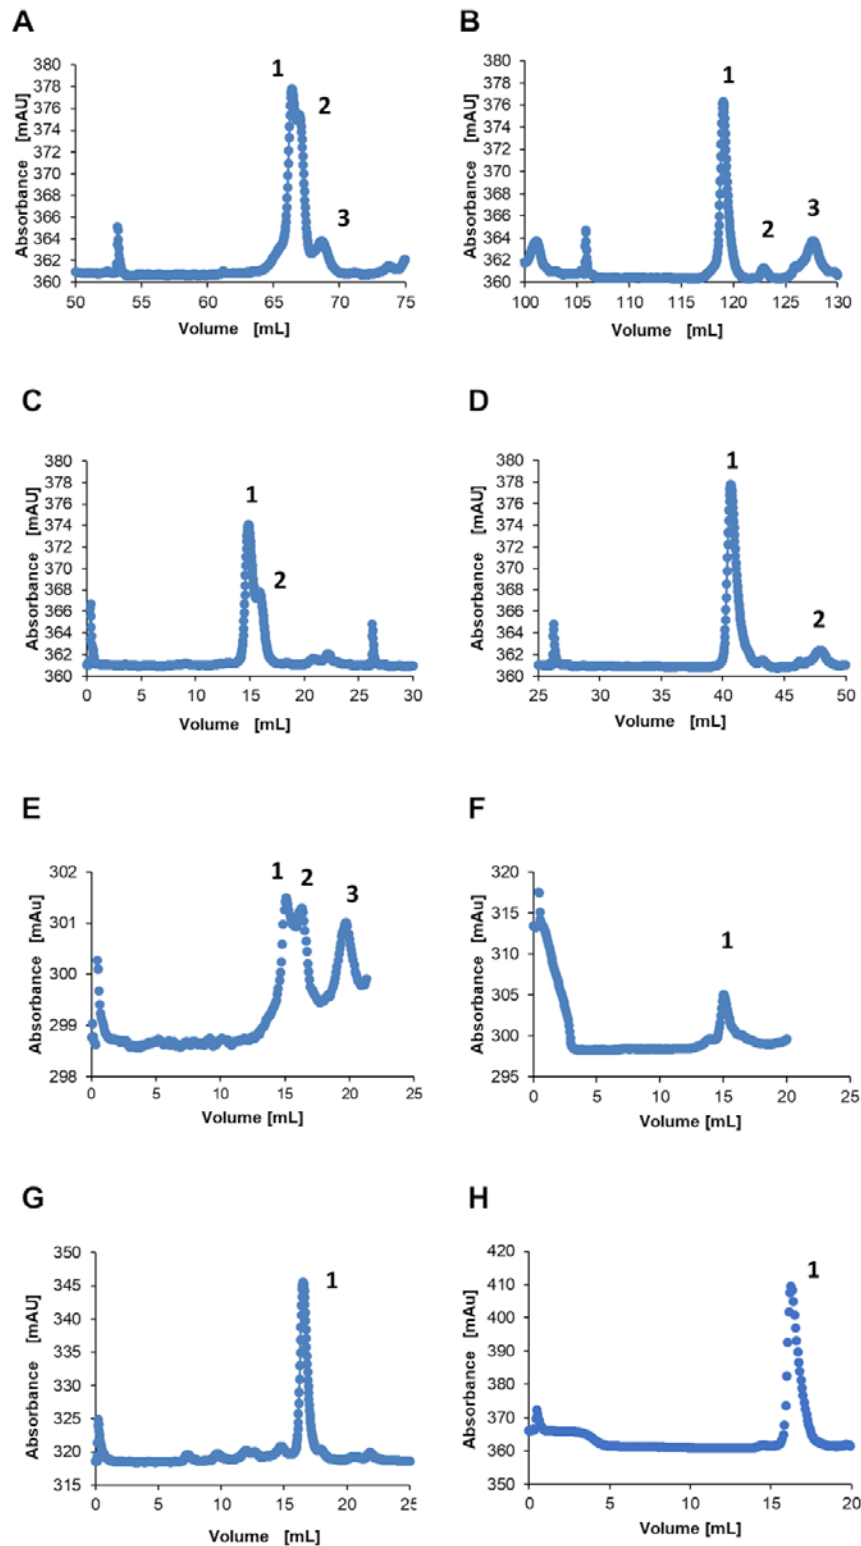

**Figure S11.** SEC profiles of Gal-3 proteins.

**A:** HSYGal-3 IMAC **B:** HSYGal-3 IMAC + ASF resin; **C:** HYGal-3 IMAC ; **D:** HYGal-3 IMAC + ASF resin resin; **E:** HSGal-3 IMAC; **F:** HSGal-3 IMAC + ASF resin resin; **G:** HGal-3 IMAC; **H:** HGal-3 IMAC + ASF resin resin. Column: Superdex 200 Increase 10/300 GL; Flow: 0.75 mL\*min<sup>-1</sup>; Buffer: PBS pH 7.5 Injection volume: 200  $\mu$ L; Sample amount: 0.0024  $\mu$ mol; M<sub>w</sub> (theoretic for monomers): HSYGal-3: 74.2 kDa, HYGal-3: 56 kDa, HSGal-3: 46.9 kDa, HGal-3: 28 kDa.

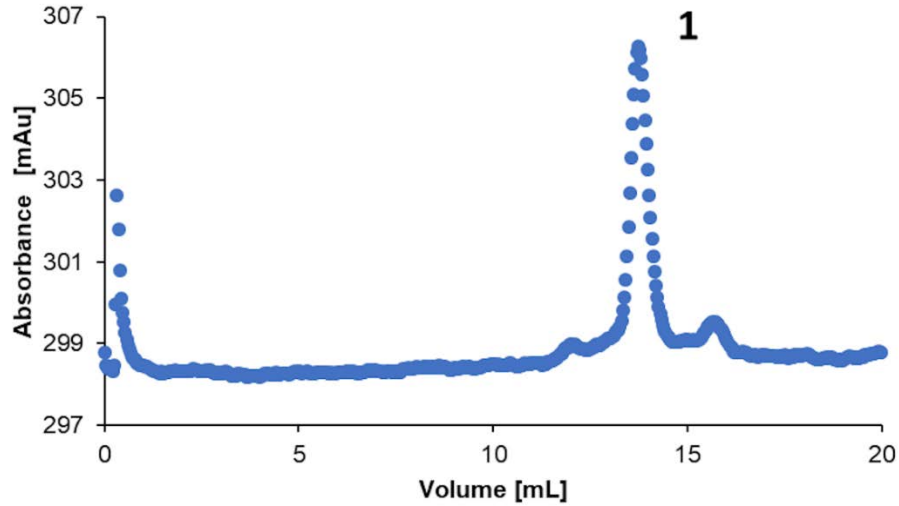

**Figure S12.** SEC profile of HSY eluate after IMAC.

Column: Superdex 200 Increase 10/300 GL; Flow: 0.75 mL\*min<sup>-1</sup>; Buffer: PBS pH 7.5 Injection volume: 200  $\mu$ L; Sample amount: 0.0024  $\mu$ mol; Peak 1: Elution volume: 13.73 mL, MW<sub>(calc.)</sub>: 88.9 kDa; M<sub>w</sub> (HSY-Monomer): 48.1 kDa.

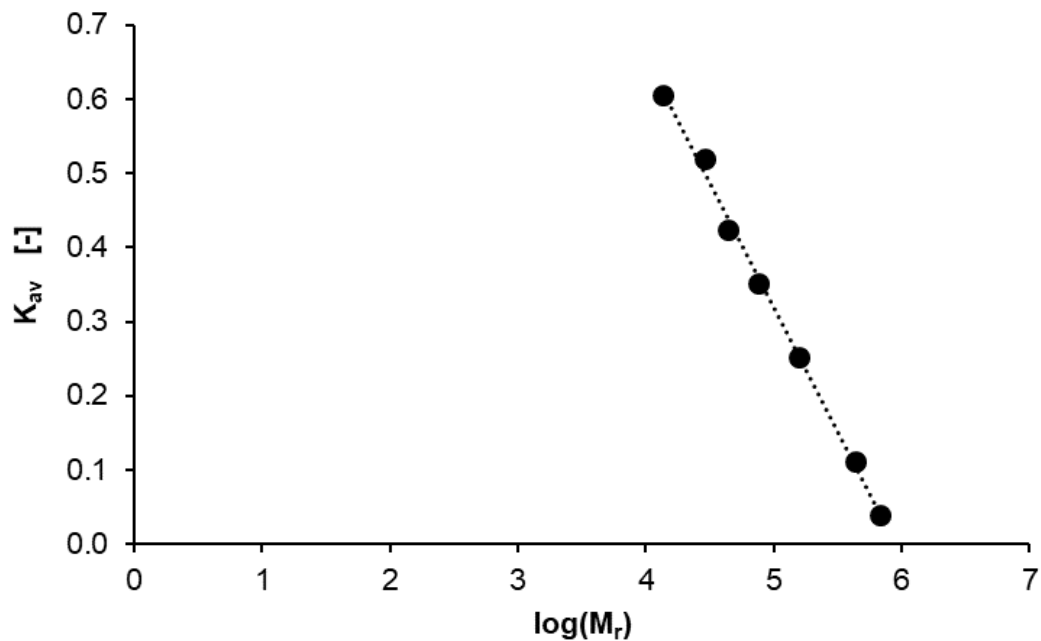

**Figure S13.** Linear regression of protein standards in SEC.

$K_{av}$  is plotted over the logarithm of the molecular weight ( $M_r$ ). Molecular weights of detected samples in SEC were calculated by equation  $y = -0.335x + 1.936$  ( $R^2 = 0.997$ ). Protein standards: Thyroglobulin (669 kDa), Ferritin (440 kDa), Aldolase (158 kDa), Conalbumin (75 kDa), Ovalbumin (44 kDa), Carbonic anhydrase (29 kDa), Ribonuclease A (13.7 kDa).

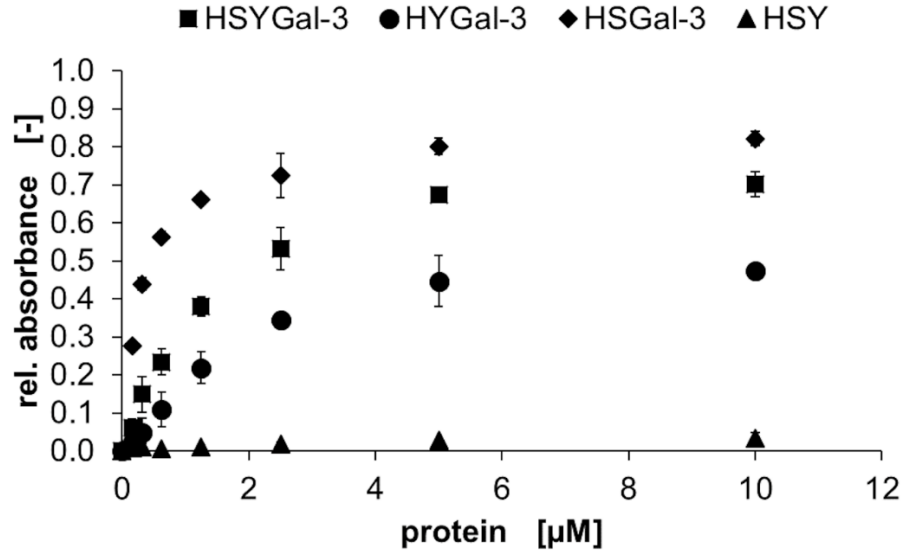

**Figure S14.** Binding of Gal-3 fusion proteins after IMAC.

The binding of IMAC-purified proteins HSYGal-3 (■), HSGal-3 (◆), HYGal-3 (●), and HSY (▲) (control) to ASF is shown. Bound galectins were detected using a peroxidase-conjugated anti-His<sub>6</sub>-antibody and conversion of TMB as the mean signal of three data points. Errors indicate standard deviations.

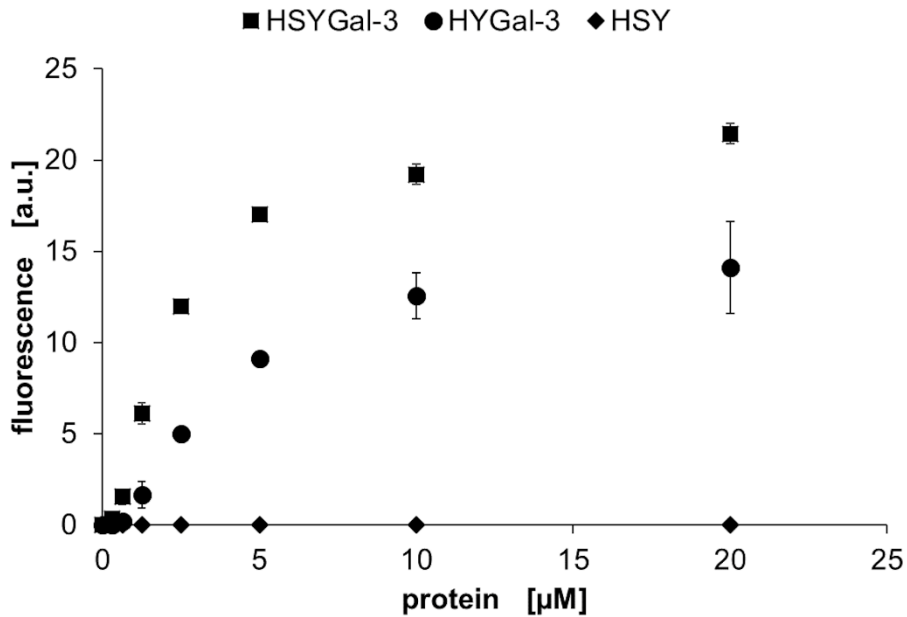

**Figure S15.** Binding of Gal-3 fusion proteins with fluorescence detection.

Binding of IMAC + ASF-Sepharose purified HSYGal-3 (■), HYGal-3 (●), and HSY (control, only IMAC) (◆) to ASF in a solid-phase binding assay. Fluorescence intensity was measured using excitation filter  $\lambda=485/20$  and emission filter  $\lambda=528/20$  as the mean signal of three data points. Error bars indicate standard deviations.

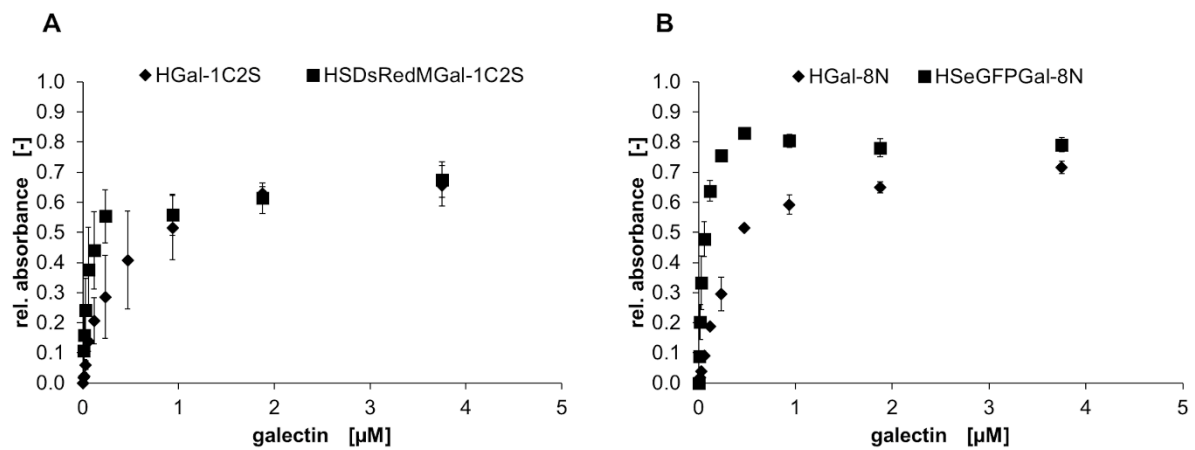

**Figure S16.** Binding of His<sub>6</sub>-tagged and fusion proteins of Gal-1C2S and Gal-8N.

The binding of His<sub>6</sub>-tagged proteins ( $\blacklozenge$ ) and fusion proteins ( $\blacksquare$ ) to ASF is shown for Gal-1C2S (**A**) and Gal-8N (**B**) in a solid-phase binding assay. Galectin binding was detected using a peroxidase-conjugated anti-His<sub>6</sub>-antibody and conversion of TMB as the mean signal of three data points. Errors indicate standard deviations.

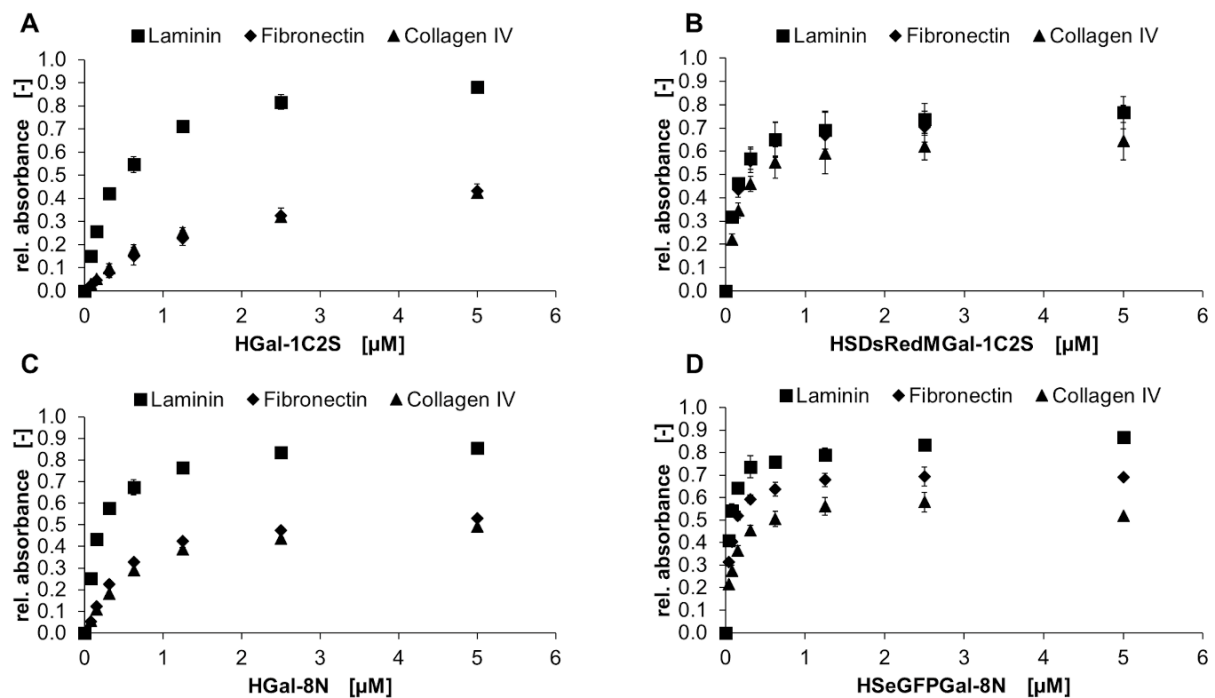

**Figure S17.** Binding of His<sub>6</sub>-tagged and galectin fusion proteins on ECM glycoproteins.

The binding of galectins to laminin ( $\blacksquare$ ), fibronectin ( $\blacklozenge$ ), and collagen IV ( $\blacktriangle$ ) in a solid-phase assay is shown. **A:** HGal-1C2S; **B:** HSDsRedMGal-1C2S; **C:** HGal-8N; **D:** HSeGFPGal-8N. Galectin binding was detected using a peroxidase-conjugated anti-His<sub>6</sub>-antibody and conversion of TMB as the mean signal of three data points. Errors indicate standard deviations.

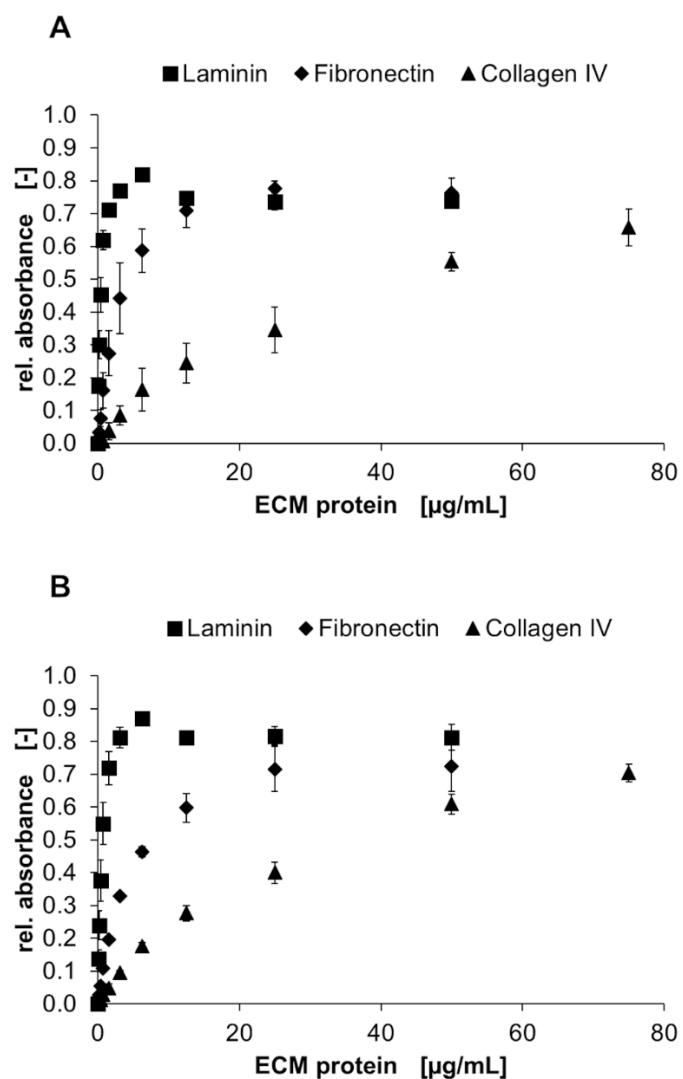

**Figure S18.** Binding of ECM glycoproteins to ASF-bound HGal-3 and HSYGal-3.

Binding curves of HGal-3 (A) and HSYGal-3 (B) for crosslinking laminin (■), fibronectin (◆), and collagen IV (▲) are shown. ECM glycoprotein binding was detected by primary anti-ECM protein-antibodies and corresponding secondary peroxidase-conjugated antibodies. Conversion of TMB was measured using three data points. Error bars indicate standard deviations.

**Table S3.** Calculated apparent  $K_D$  values of laminin, fibronectin, and collagen IV binding to ASF-bound HGal-3 and HSYGal-3 in a solid-phase binding assay. Values were calculated by non-linear regression assuming one-site saturation.

|          | Apparent $K_D$ [ $\mu\text{M}$ ] |                |                |
|----------|----------------------------------|----------------|----------------|
|          | Laminin                          | Fibronectin    | Collagen IV    |
| HGal-3   | $0.27 \pm 0.03$                  | $5.1 \pm 0.1$  | $41.4 \pm 8.5$ |
| HSYGal-3 | $0.45 \pm 0.04$                  | $10.0 \pm 1.1$ | $34.7 \pm 3.1$ |

**Table S4.** *E.coli* strains used for recombinant expression of galectin constructs.

| <b><i>E.coli</i> strain</b> | <b>Galectin construct</b>                                                                                                                                                                                                                              |
|-----------------------------|--------------------------------------------------------------------------------------------------------------------------------------------------------------------------------------------------------------------------------------------------------|
| BL21 (DE3)                  | pET28a::HYGal-3                                                                                                                                                                                                                                        |
| Rosetta (DE3) pLysS         | pET28a::HDsRedMGal-1C2S<br>pETDuet-1:: HGal-1C2S<br>pETDuet-1:: HGal-3<br>pETDuet-1:: HGal-8N<br>pETDuet-1:: HGal-8C<br>pET17b::HSDsRedMGal-1C2S<br>pET17b::HSYGal-3<br>pET17b::HSeGFPGal-8N<br>pET17b::HSeGFPGal-8C<br>pET17b::HSGal-3<br>pET17b::HSY |
| Rosetta 2 (DE3) pLysS       | pET28a::HeGFPGal-8N<br>pET17b::HSGal-8N<br>pET17b::HSGal-1C2S<br>pET17b::HSDsRedM<br>pET17b::HSeGFP                                                                                                                                                    |
